# Supplementary material for: Multiferroic Aurivillius Bi4Ti2−xMnxFe0.5Nb0.5O12 (n = 3) compounds with tailored magnetic interactions
Source: Royal Society of Chemistry journal article supplement (doi:10.1039/d1dt02220b), 2021-01-01
Supplement: d1dt02220b1.pdf [file d1dt02220b1.pdf]

*Supplementary SEM data*

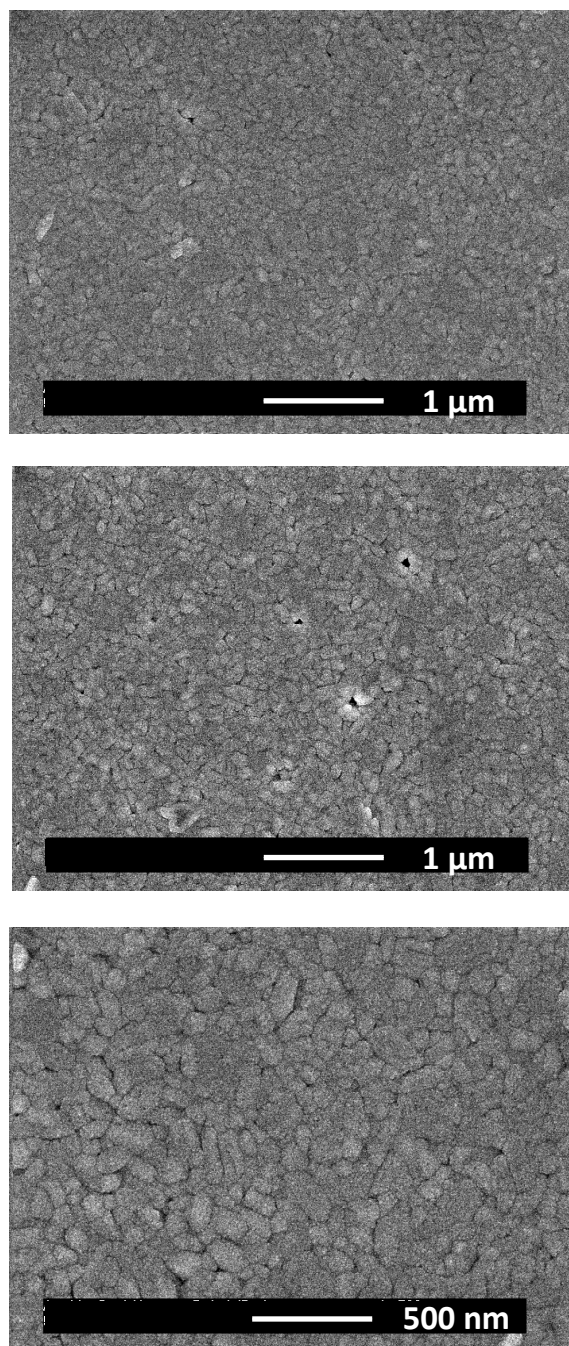

**Fig. S1.** Reduced magnification images for the Aurivillius  $\text{Bi}_4\text{Ti}_{1.5}\text{Mn}_{0.5}\text{Fe}_{0.5}\text{Nb}_{0.5}\text{O}_{12}$  ( $x=0.5$ ) ceramic processed by SPS of thermally treated powdered phases. Note the high microstructural homogeneity, consistently found all across the sample.

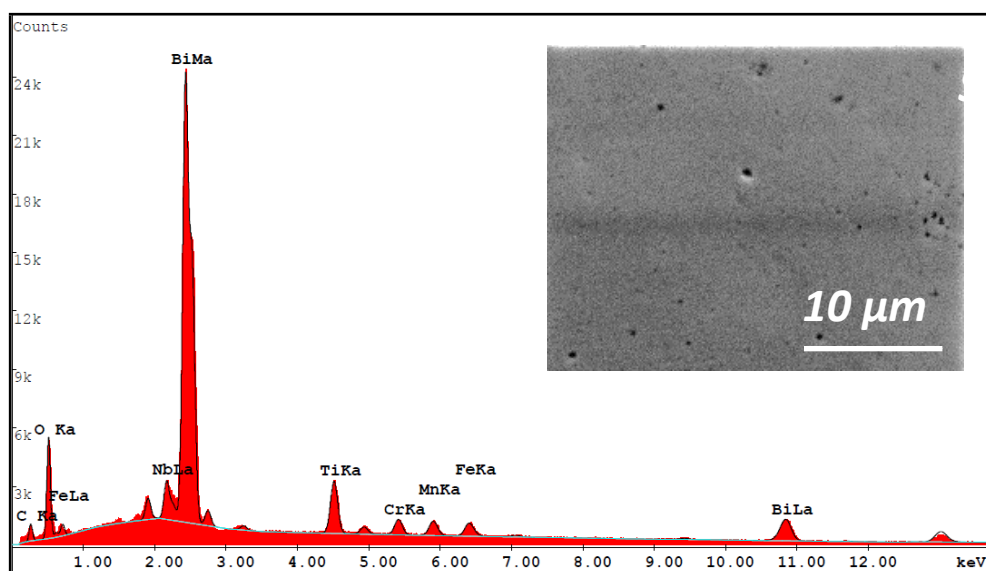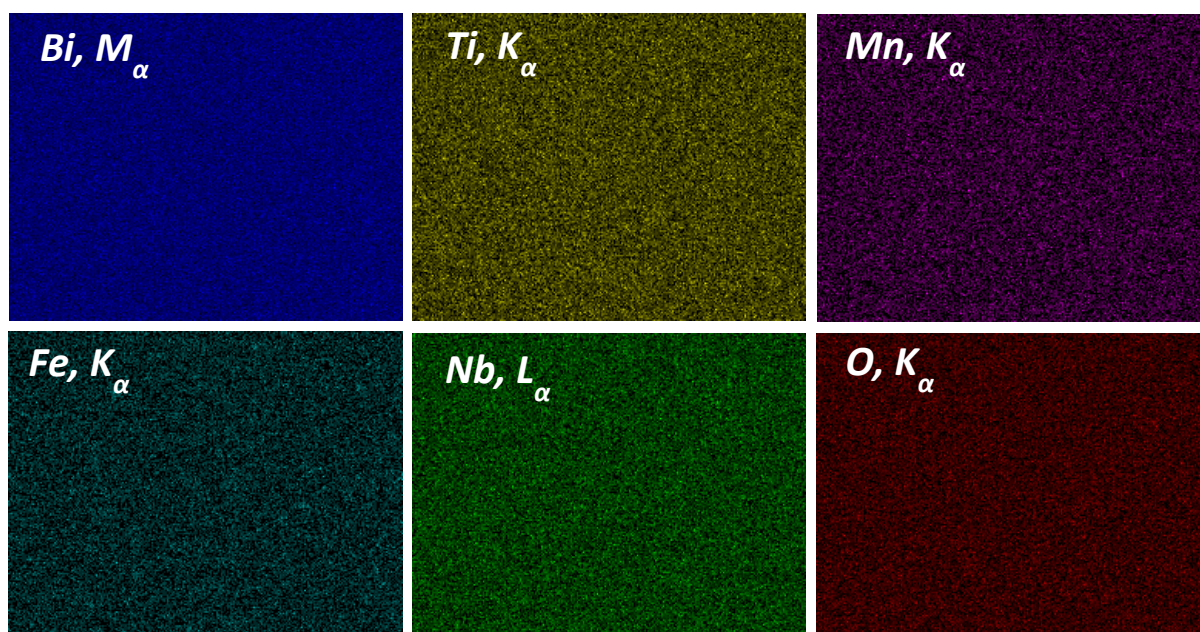

**Fig. S2.** EDXS accumulated spectrum and elementary mappings across a 30x25  $\mu\text{m}^2$  area for the Bi<sub>4</sub>Ti<sub>1.5</sub>Mn<sub>0.5</sub>Fe<sub>0.5</sub>Nb<sub>0.5</sub>O<sub>12</sub> (x=0.5) ceramic material, where chemical heterogeneities are not observed. Cr signal originates from the conductive coating deposited to avoid charging effects.



Supplementary electrical data

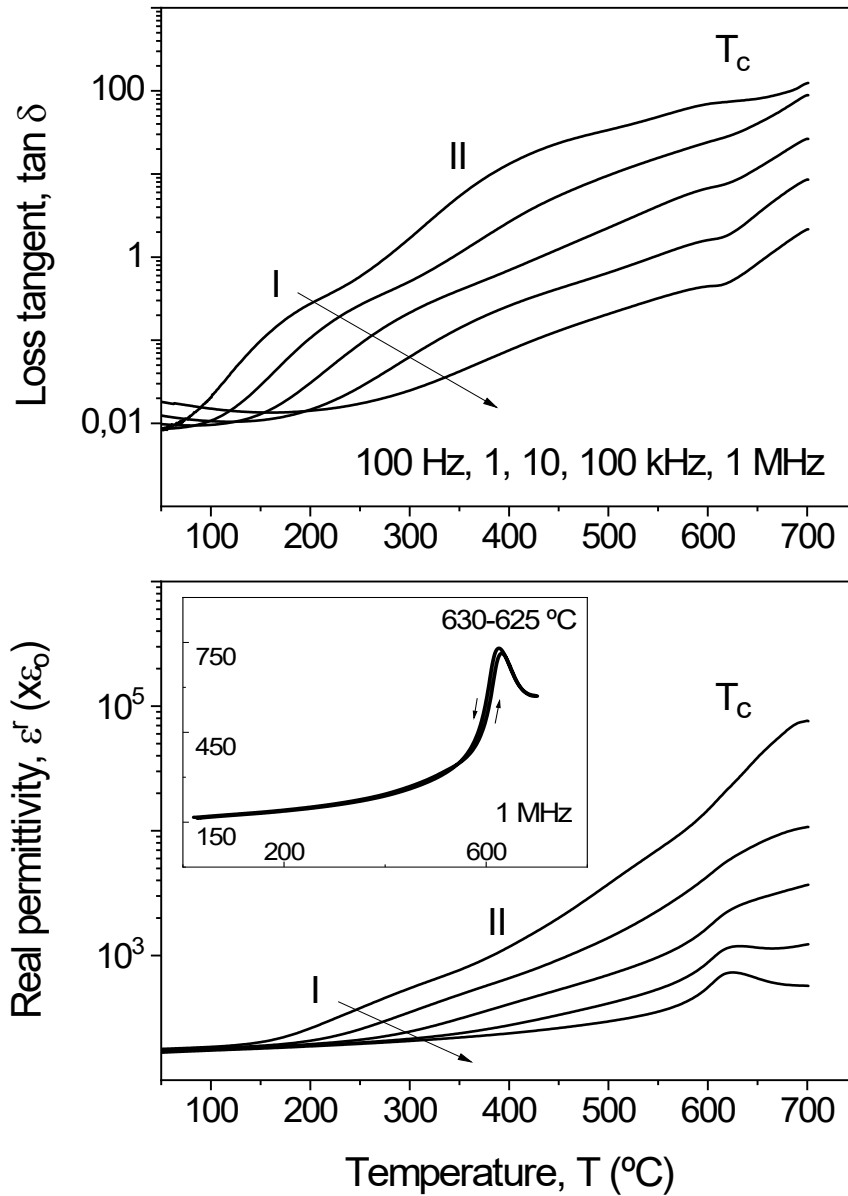

**Fig. S3.** Temperature dependences of the dielectric permittivity (bottom) and losses (top) for the  $\text{Bi}_4\text{Ti}_2\text{Nb}_{0.5}\text{Fe}_{0.5}\text{O}_{12}$  ( $x=0$ ) ceramic processed by SPS, at several frequencies. The two successive dielectric relaxations and the ferroelectric transition are labelled as I, II and  $T_c$ . Inset shows the thermal

hysteresis across the transition anomaly at 1 MHz (Curie temperatures are indicated).

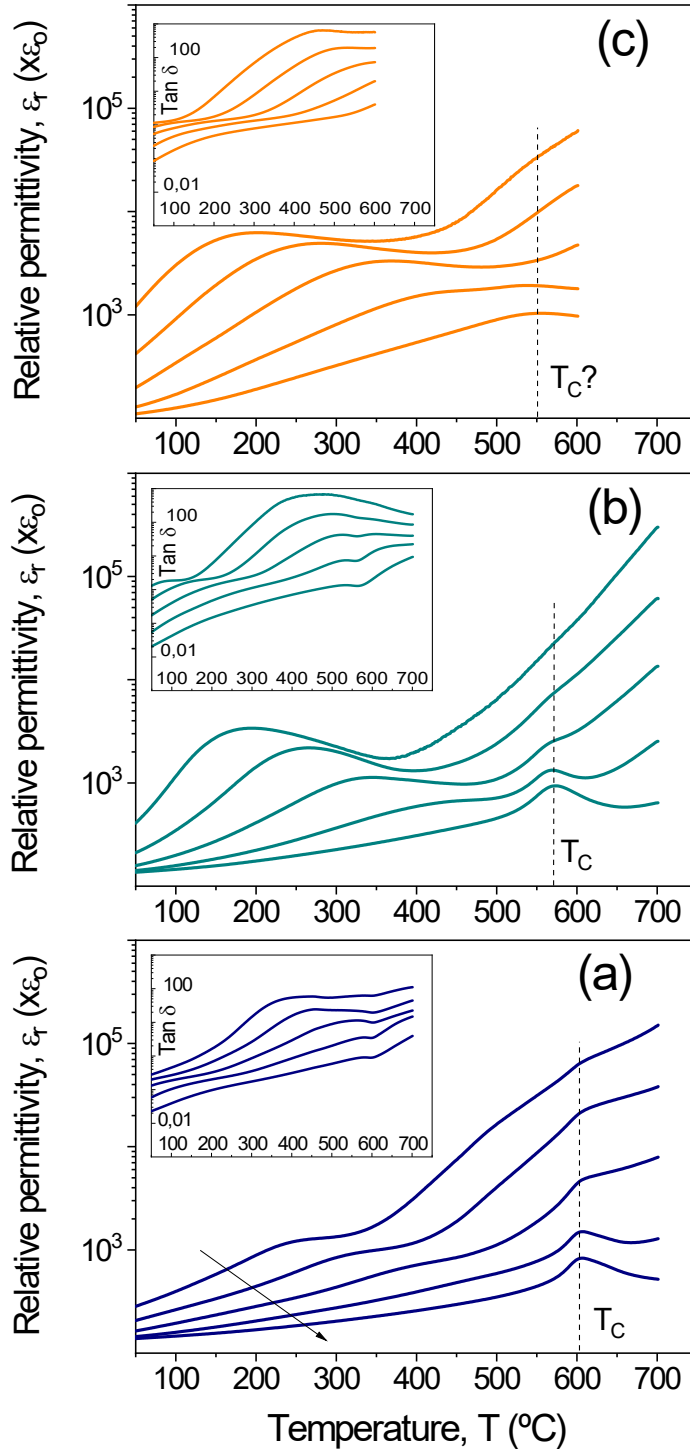

**Fig. S4.** Temperature dependence of the dielectric permittivity for the  $\text{Bi}_4\text{Ti}_{2-x}\text{Mn}_x\text{Fe}_{0.5}\text{Nb}_{0.5}\text{O}_{12}$  ceramic materials with (a)  $x=0.1$ , (b)  $x=0.3$ , and (c)  $x=0.5$ , at five frequencies (100 Hz, 1, 10 and 100 kHz, and 1 MHz; arrow indicates

increasing  $f$ ). Note the Maxwell-Type type relaxation at intermediate temperatures, and the ferroelectric transition above it marked with  $T_C$ . Insets show corresponding loss tangent.

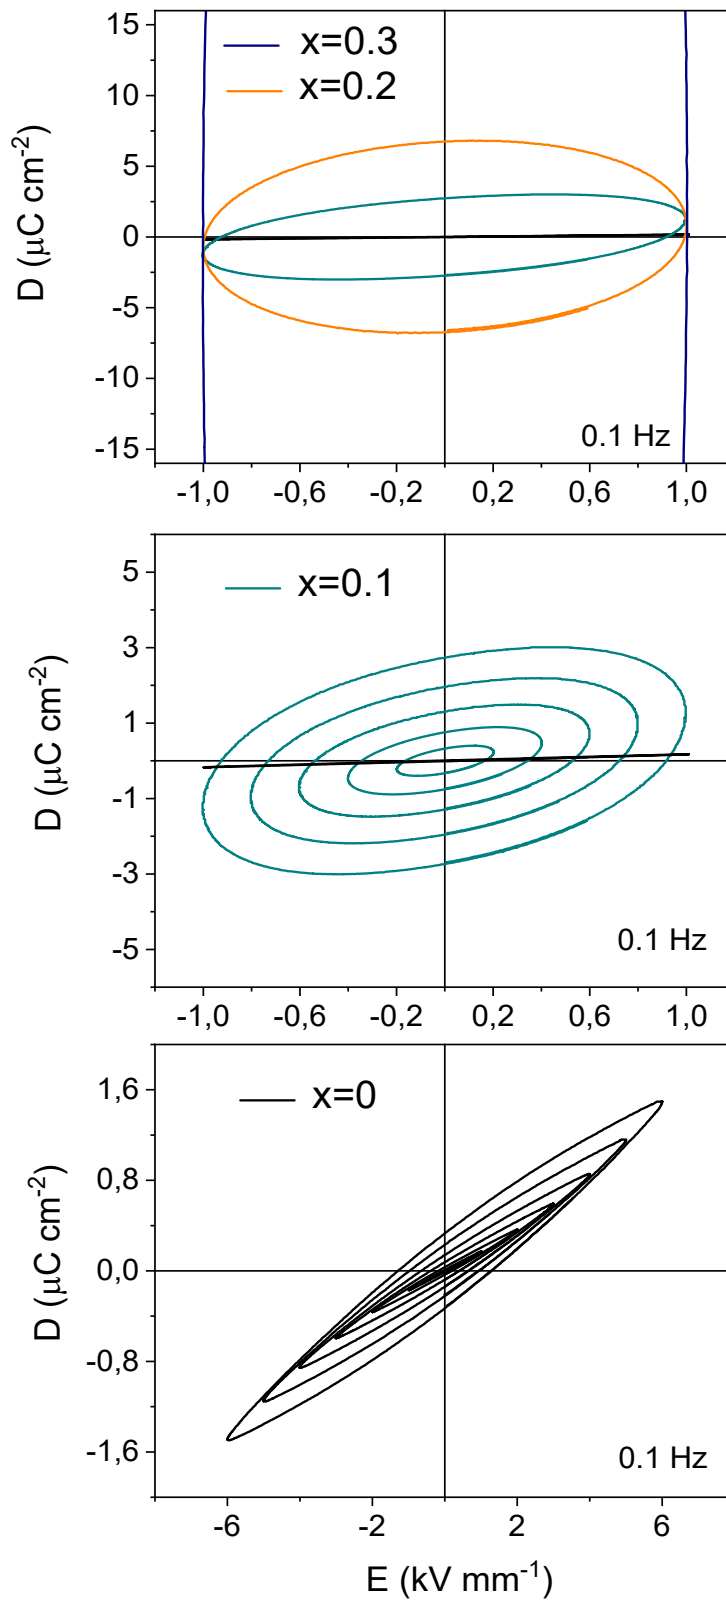

**Fig. S5.** RT high field electrical response for the  $\text{Bi}_4\text{Ti}_{2-x}\text{Mn}_x\text{Fe}_{0.5}\text{Nb}_{0.5}\text{O}_{12}$  ceramic materials. Note the Rayleigh-type behaviour for  $x=0$ , and the increasing leakage currents with  $x$ .

*Supplementary PFM data*

**Fig. S6.** (a) Topography, and piezoresponse (b) amplitude and (c) phase images of  $\text{Bi}_4\text{Ti}_2\text{Mn}_{0.5}\text{Fe}_{0.5}\text{Nb}_{0.5}\text{O}_{12}$  ( $x=0.5$ ) demonstrating the presence of ferroelectric inversion domains.

*Supplementary magnetic data*

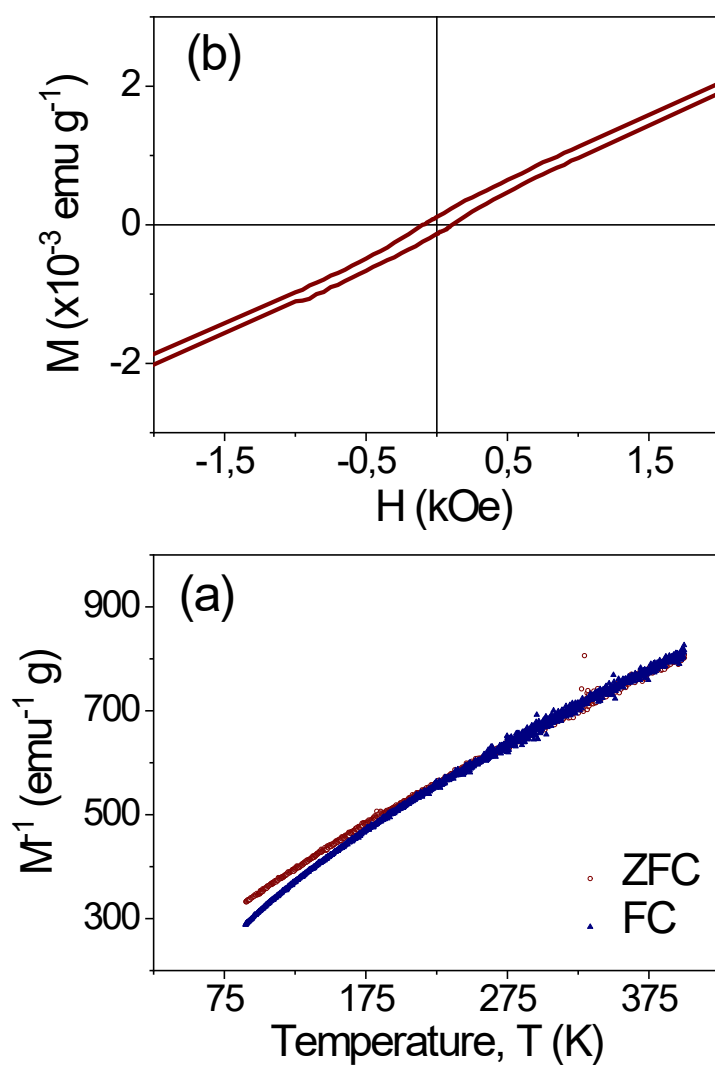



**Fig. S7.** (a) ZFC and FC reciprocal magnetizations at 300 Oe and increasing temperatures for the  $\text{Bi}_4\text{Ti}_{1.8}\text{Mn}_{0.2}\text{Fe}_{0.5}\text{Nb}_{0.5}\text{O}_{12}$  ( $x=0.2$ ) ceramic material, and (b) isothermal magnetization for the same Aurivillius phase at 100 K (the paramagnetic high field linear contribution has been subtracted). Note the appearance of irreversibility at low temperature, and the presence of hysteresis in the high field response.
